# Supplementary material
Source: publisher figshare collection journal article supplement (https://sage.figshare.com/ndownloader/files/24129762)
Supplement: Supplementary file 1 [file 24129762]

| <b>Supplemental Table 3: NHD Patient Destinations</b> |          |          |
|-------------------------------------------------------|----------|----------|
|                                                       | <b>#</b> | <b>%</b> |
| Skilled Nursing Facility                              | 2,090    | 55.03    |
| Acute Rehabilitation                                  | 1,671    | 44.00    |
| Long-term Acute Care Facility                         | 29       | 0.76     |
| Unskilled Facility, Not Home                          | 6        | 0.16     |
| Hospice                                               | 1        | 0.03     |
| Multi-level Senior Community                          | 1        | 0.03     |

NHD=non-home discharge
